# Supplementary material
Source: PubMed Central journal article supplement (PMC3042475)
Supplement: 091824_1.pdf [file 091824_1.pdf]

Appendix 1 (as submitted by the authors)

**Appendix Table 1: Adverse event definitions by ICD-9 code**

| <b>Adverse Event Category</b> | <b>ICD-9 Codes</b>                                                                      |
|-------------------------------|-----------------------------------------------------------------------------------------|
| Hepatic                       | 571.4, 573, 573.1, 573.3, 780.7, 782.4, 789.1, 789.2, 789.5, 790.4, 790.5, 790.6, 794.8 |
| Allergy                       | 693, 693.0, 287.0, 695.1, 695.9, 698.9, 780.6, 782.1, 995.2, 995.3                      |
| Gastrointestinal              | 783.0, 783.2, 783.3, 787.0, 536.8, 562.0, 562.1, 564, 564.1, 555, 789.0                 |
| Hematologic                   | 284.8, 287.2, 287.4, 287.5, 288                                                         |
| Poisoning                     | 960, 960.6, 961, 961.8                                                                  |

Abbreviations: ICD-9 = International Statistical Classification of Injuries and Causes of Death, 9<sup>th</sup> revision conference.
